# Supplementary material for: Fish Diversity in Relation to Littoral Habitats in Three Basins of Lake Kivu (East Africa)
Source: MDPI journal article supplement (doi:10.3390/d15091014), 2023-09-12
Supplement: s1 [file s1]

Archive with 2 entries (2 files):
- diversity-2356785-Supplemental Material Figure S1.pdf
- diversity-2356785-Supplemental Materials Table S1.pdf
