# Supplementary material for: Fish Diversity in Relation to Littoral Habitats in Three Basins of Lake Kivu (East Africa)
Source: MDPI journal article supplement (doi:10.3390/d15091014), 2023-09-12
Supplement: s1 [file s1 › diversity-2356785-Supplemental Material Figure S1.pdf]

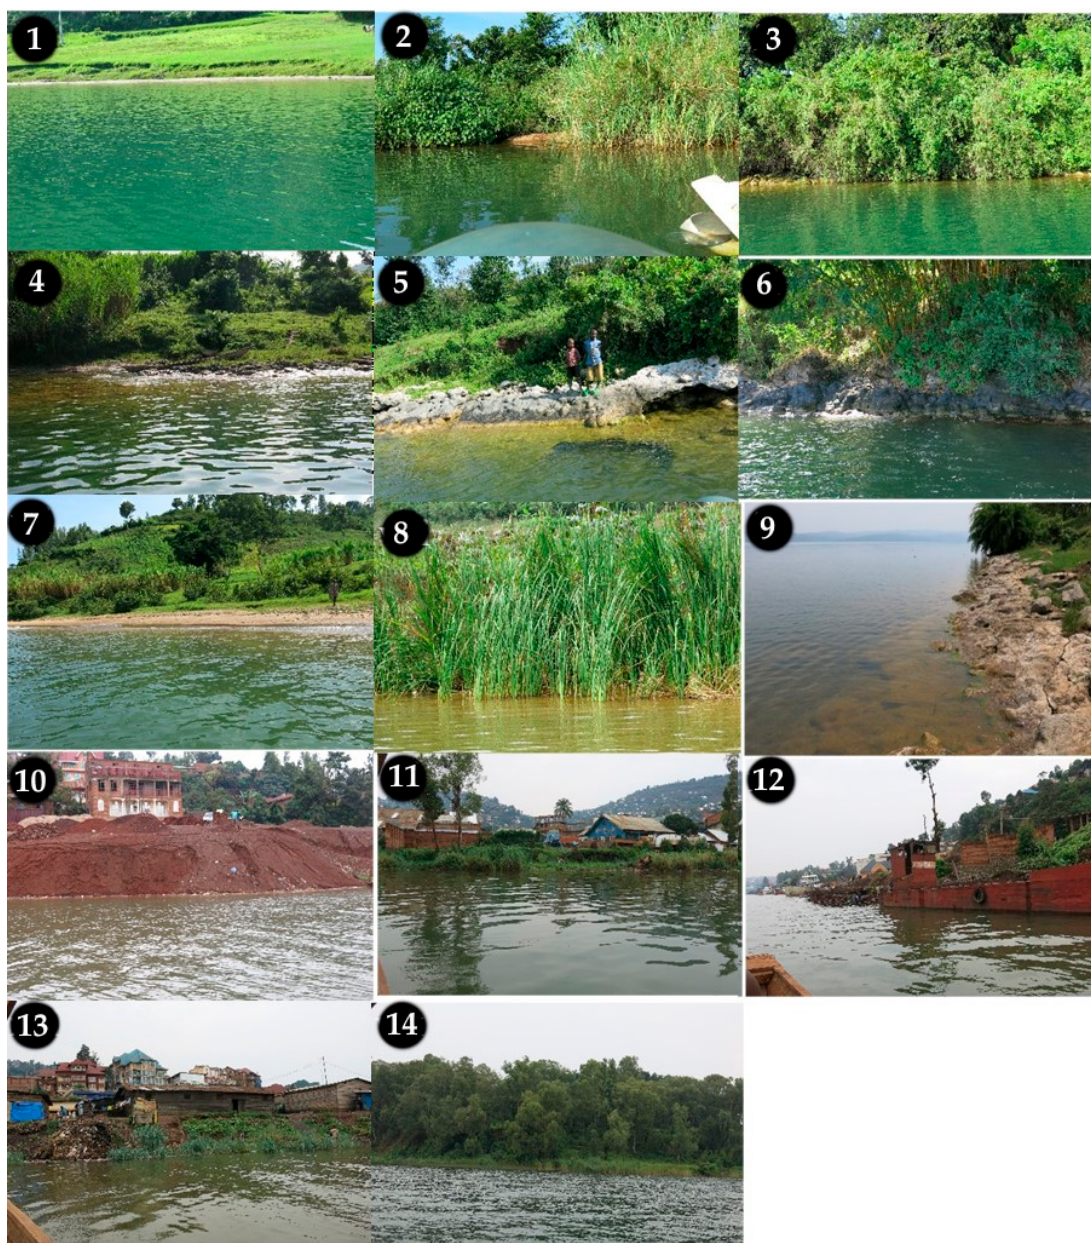

Supplemental Materials: Figure S1. Photographs of the sampling sites: 1 to 14 represent the different sites. Photographs by Kisekelwa T.
