# Supplementary material for: Fish Diversity in Relation to Littoral Habitats in Three Basins of Lake Kivu (East Africa)
Source: MDPI journal article supplement (doi:10.3390/d15091014), 2023-09-12
Supplement: s1 [file s1 › diversity-2356785-Supplemental Materials Table S1.pdf]

Supplemental Materials: Table S1. Variation and average of ecological variables across sampling sites excluding substrate, cover and macrophyte coverage for which a single value was noted. Min: minimum, max: maximum, av: average and std: standard deviation. SNCC: Société Nationale de Chemin de Fer du Congo.

|                                         | Temperature |      |      |      | Conductivity |        |        |       | Dissoved Oxygen |     |     |      |
|-----------------------------------------|-------------|------|------|------|--------------|--------|--------|-------|-----------------|-----|-----|------|
| North basin                             |             |      |      |      |              |        |        |       |                 |     |     |      |
|                                         | Min         | Max  | Av   | Std  | Min          | Max    | Av     | Std   | Min             | Max | Av  | Std  |
| (1) Sandy patch                         | 24.3        | 26.7 | 24.8 | ±0.9 | 1136.0       | 1152.0 | 1143.3 | ±6.0  | 7.0             | 7.7 | 7.4 | ±0.3 |
| (2) Rock and macrophytes                | 22.7        | 26.3 | 24.5 | ±1.1 | 1137.0       | 1153.0 | 1144.5 | ±5.9  | 7.0             | 7.8 | 7.4 | ±0.3 |
| (3) Rocky shore                         | 24.2        | 25.9 | 24.7 | ±0.6 | 1137.0       | 1153.5 | 1146.2 | ±5.9  | 7.0             | 7.8 | 7.5 | ±0.3 |
| (4) Rocks mixed with sand               | 24.1        | 25.6 | 24.8 | ±0.5 | 1129.5       | 1153.5 | 1144.0 | ±8.4  | 6.8             | 8.3 | 7.5 | ±0.5 |
| (5) Rocky shore                         | 23.8        | 25.7 | 24.6 | ±0.7 | 1134.0       | 1155.0 | 1145.3 | ±8.0  | 6.9             | 7.9 | 7.3 | ±0.4 |
| (6) Rocky shore—shaded                  | 23.9        | 25.9 | 24.7 | ±0.7 | 1137.5       | 1149.0 | 1143.0 | ±3.9  | 6.7             | 8.0 | 7.5 | ±0.5 |
| (7) Sandy patch                         | 24.4        | 26.4 | 25.4 | ±0.7 | 1140.5       | 1152.5 | 1144.6 | ±5.0  | 6.7             | 8.5 | 7.6 | ±0.6 |
| South basin                             |             |      |      |      |              |        |        |       |                 |     |     |      |
| (8) Ishungu with macrophytes            | 23.4        | 24.6 | 24.1 | ±0.5 | 1190.0       | 1195.0 | 1192.0 | ±2.1  | 6.2             | 6.7 | 6.4 | ±0.2 |
| (9) Ishungu with a rocky shore          | 23.1        | 25.2 | 23.9 | ±1.0 | 1202.0       | 1219.0 | 1206.3 | ±8.5  | 6.0             | 6.5 | 6.4 | ±0.3 |
| (10) Kalengera with a denuded shore     | 22.8        | 24.1 | 23.3 | ±0.6 | 1149.0       | 1190.0 | 1165.0 | ±19.2 | 5.2             | 5.5 | 5.4 | ±0.2 |
| (11) Kalengera with macrophytes         | 22.1        | 23.8 | 23.1 | ±0.7 | 1150.0       | 1198.0 | 1168.5 | ±22.8 | 5.2             | 6.6 | 5.9 | ±0.6 |
| (12) Alleluia Port with a denuded shore | 22.8        | 23.9 | 23.3 | ±0.5 | 1148.0       | 1170.0 | 1155.5 | ±9.9  | 5.0             | 6.1 | 5.6 | ±0.5 |
| (13) SNCC beach with macrophytes        | 22.7        | 23.7 | 23.2 | ±0.4 | 1150.0       | 1187.0 | 1167.8 | ±20.0 | 4.4             | 6.5 | 5.6 | ±0.9 |
| (14) Governor’s park with macrophytes   | 22.7        | 23.8 | 23.4 | ±0.5 | 1152.0       | 1197.0 | 1173.5 | ±20.3 | 5.2             | 6.4 | 5.9 | ±0.6 |

Supplemental Materials: Table S1 continued

|                                         | pH  |     |     |      | Transparency (cm) |       |       |         | Depth (cm) |  |       |        |       |        |
|-----------------------------------------|-----|-----|-----|------|-------------------|-------|-------|---------|------------|--|-------|--------|-------|--------|
| North basin                             |     |     |     |      |                   |       |       |         |            |  |       |        |       |        |
|                                         | Min | Max | Av  | Std  |                   | Min   | Max   | Av      | Std        |  | Min   | Max    | Av    | Std    |
| (1) Sandy patch                         | 7.2 | 8.8 | 8.4 | ±0.6 |                   | 160.0 | 300.0 | 163.7   | ±53.0      |  | 86.7  | 466.7  | 181.1 | ±145.6 |
| (2) Rock and macrophytes                | 7.2 | 8.7 | 8.4 | ±0.6 |                   | 160.0 | 300.0 | 197.8   | ±53.0      |  | 143.3 | 346.7  | 205.8 | ±76.8  |
| (3) Rocky shore                         | 7.2 | 8.8 | 8.4 | ±0.6 |                   | 170.0 | 260.0 | 237.8   | ±34.2      |  | 180.0 | 500.0  | 253.8 | ±122.3 |
| (4) Rocks mixed with sand               | 7.2 | 8.9 | 8.5 | ±0.6 |                   | 120.0 | 320.0 | 236.8   | ±88.8      |  | 136.7 | 320.0  | 204.4 | ±65.1  |
| (5) Rocky shore                         | 7.3 | 8.8 | 8.4 | ±0.6 |                   | 175.0 | 460.0 | 330.8.0 | ±102.0     |  | 226.7 | 396.0  | 313.2 | ±62.8  |
| (6) Rocky shore—shaded                  | 7.3 | 8.7 | 8.4 | ±0.6 |                   | 250.0 | 420.0 | 300.8   | ±63.9      |  | 356.0 | 650.0  | 473.8 | ±112.5 |
| (7) Sandy patch                         | 7.2 | 8.8 | 8.4 | ±0.6 |                   | 130.0 | 300.0 | 170.0   | ±64.5      |  | 173.3 | 393.3  | 248.8 | ±85.6  |
| South basin                             |     |     |     |      |                   |       |       |         |            |  |       |        |       |        |
| (8) Ishungu with macrophytes            | 8.6 | 9.1 | 9.0 | ±0.2 |                   | 140.0 | 520.0 | 297.5   | ±159.7     |  | 158.0 | 550.0  | 327.0 | ±163.9 |
| (9) Ishungu with a rocky shore          | 8.9 | 9.2 | 9.1 | ±0.1 |                   | 300.0 | 540.0 | 400.0   | ±102.0     |  | 300.0 | 1070.0 | 692.5 | ±314.6 |
| (10) Kalengera with a denuded shore     | 9.0 | 9.2 | 9.1 | ±0.1 |                   | 200.0 | 300.0 | 235.0   | ±47.3      |  | 200.0 | 770.0  | 492.5 | ±232.9 |
| (11) Kalengera with macrophytes         | 8.7 | 9.1 | 8.9 | ±0.2 |                   | 180.0 | 360.0 | 262.5   | ±82.6      |  | 340.0 | 460.0  | 385.0 | ±57.4  |
| (12) Alleluia Port with a denuded shore | 8.2 | 9.1 | 8.8 | ±0.4 |                   | 140.0 | 240.0 | 200.0   | ±43.2      |  | 980.0 | 1030.0 | 992.5 | ±25.0  |
| (13) SNCC beach with macrophytes        | 7.4 | 9.1 | 8.4 | ±0.8 |                   | 160.0 | 260.0 | 202.5   | ±46.5      |  | 270.0 | 570.0  | 407.5 | ±160.1 |
| (14) Governor’s park with macrophytes   | 8.5 | 9.1 | 8.9 | ±0.3 |                   | 280.0 | 360.0 | 310.0   | ±34.6      |  | 330.0 | 370.0  | 340.0 | ±20.1  |
